# Supplementary material
Source: publisher site journal article supplement (https://www.dovepress.com/article/116029)
Supplement: Supplementary file 1 [file get_supplementary_file.php]

## Subject Ability to Use System Scale – Healthcare Professional Version

On a scale from 1 to 100 (see descriptors below), was the subject able to successfully change the patch and pair with application on the smartphone independently? SCORE (1-100)

| Range of Assistance Needed and Level of Understanding | Score  | Descriptor                                                                                                                                                                                                        |
|-------------------------------------------------------|--------|-------------------------------------------------------------------------------------------------------------------------------------------------------------------------------------------------------------------|
| Complete, no understanding                            | 1-10   | Not able to change or pair the patch without significant help and does not appear to understand process                                                                                                           |
| Complete, some understanding                          | 11-20  | Not able to either change patch or pair patch with app correctly without significant help on all aspects, but appears to somewhat understand process                                                              |
| Complete, with moderate understanding                 | 21-30  | Appears to understand most of process and was able to begin approximating correct patch placement or pairing, but still required significant help with both aspects                                               |
| Nearly Complete, with moderate understanding          | 31-40  | Required significant assistance in understanding order of processes or required step by step direct guidance, <u>but was able to do some aspects by themselves</u> . Reports and shows some understanding process |
| Moderate, reasonable understanding                    | 41-50  | Was able to either properly place patch on own, or pair patch, <u>but not both without at least moderate guidance for both processes</u> . Understands process                                                    |
| Moderate, reasonable understanding                    | 51-60  | Was able to place or pair patch with minimal assistance on one of these aspects, but more extensive (moderate help) on one of the elements. Understands process                                                   |
| Moderate, good understanding                          | 61-70  | Was able to either properly place patch on own, but required moderate help with pairing, or required moderate help in placing patch but could pair on their own successfully. Understands process                 |
| Minimal, good understanding                           | 71-80  | Needed only minimal assistance with <u>both</u> patch and pairing process. Understands process                                                                                                                    |
| Minimal, good understanding                           | 81-90  | Needed only minimal assistance with <u>either</u> patch or pairing process, but not both processes (ie, could complete one aspect independently). Understands process                                             |
| None – Independent; full understanding                | 91-100 | Was able to place patch successfully and pair with application independently and with understanding of process                                                                                                    |

Comments (briefly describe areas of patch placement or pairing that required assistance – if any): \_\_\_\_\_

\_\_\_\_\_
